# Supplementary material
Source: publisher figshare collection journal article supplement (https://gsajournals.figshare.com/articles/dataset/_/7210262)
Supplement: Supplementary file 5 [file 1]

A

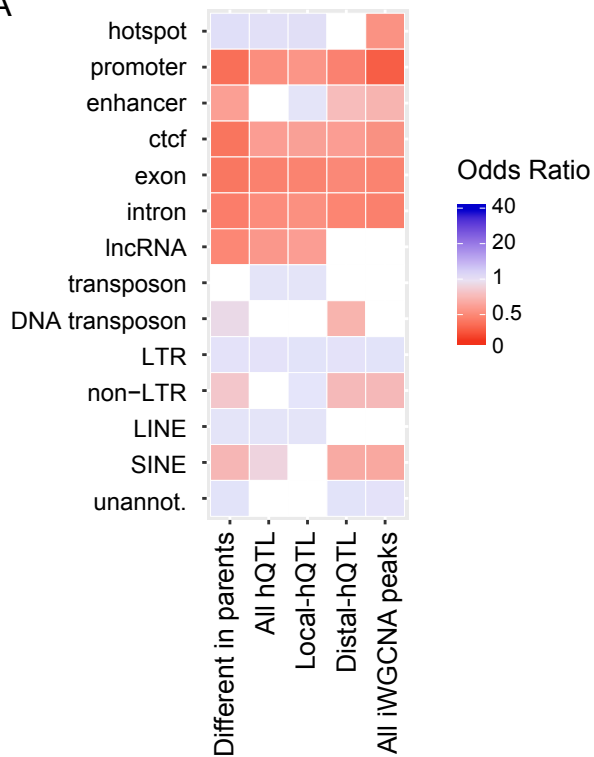

B

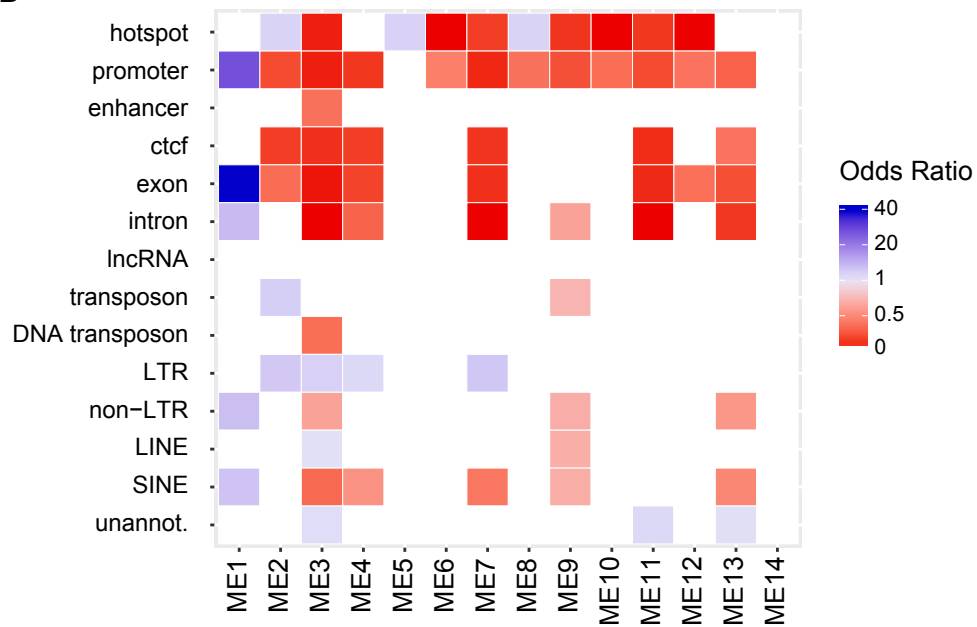

**Figure S5.** *Functional annotation of H3K4me3 peaks.* (A) Peaks were classified by whether they overlapped with several categories of genomic elements by at least one base pair. The same H3K4me3 peak can be annotated in more than one category (for example, both promoter and insulator). Enrichment or depletion was based on the distribution of annotations for all peaks. (B) Similar to A, indicating functional enrichment of H3K4me3 peaks found in hQTL modules as defined by correlation network analysis.
