# Supplementary material
Source: publisher figshare collection journal article supplement (https://gsajournals.figshare.com/articles/dataset/_/7210262)
Supplement: Supplementary file 6 [file 1]

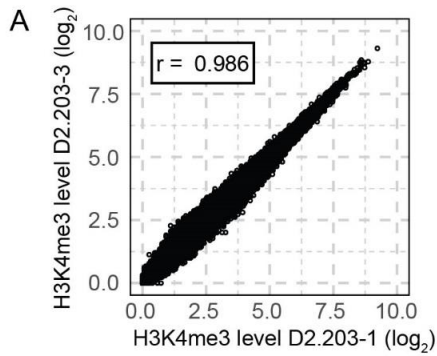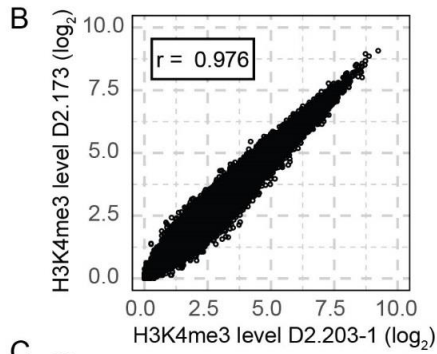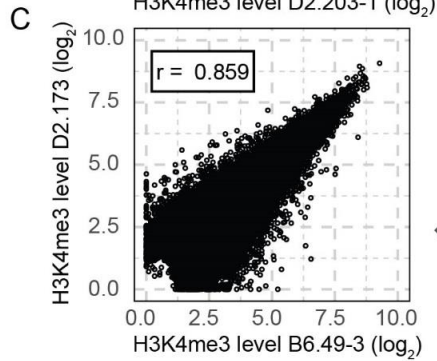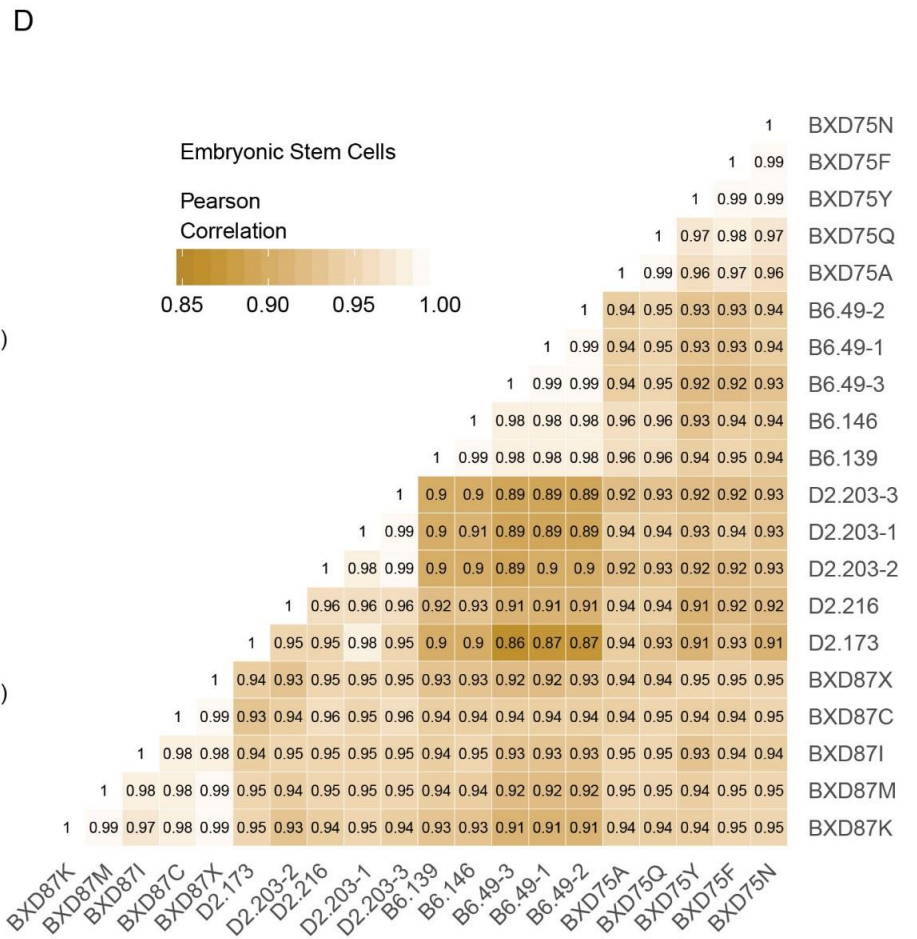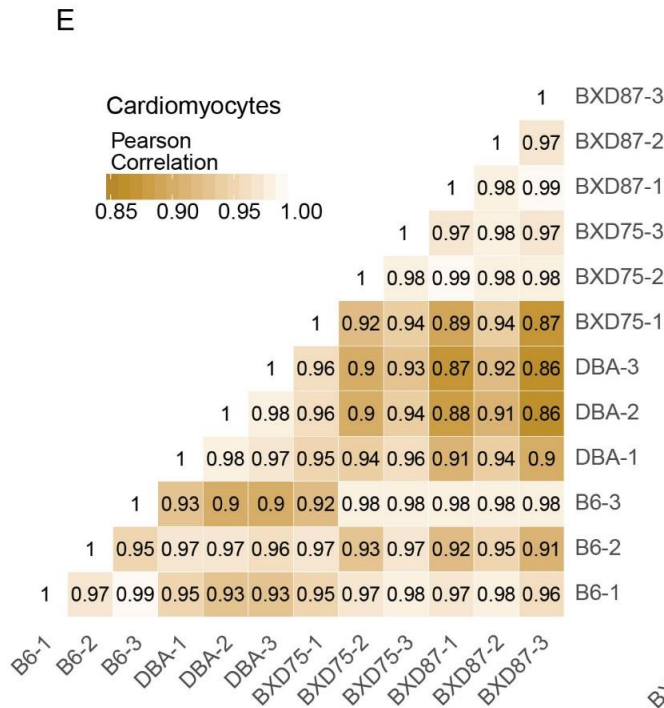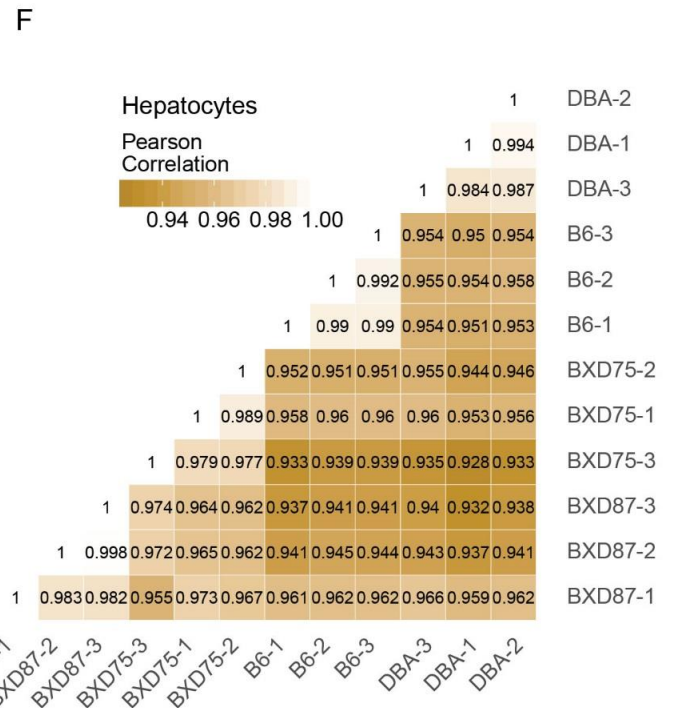

**Figure S3.** *Pearson Correlations for all hepatocytes, cardiomyocytes, and ESCs.* (A) Example of technical replicate H3K4me3 ChIP-seq for two independent cultures of the same D2 ESC line. (B) Example of biological replicates for H3K4me3 ChIP-seq for two ESC lines derived from independent blastocysts. (C) Scatterplot comparing H3K4me3 ChIP-seq between on B6 and one D2 ESC line. (D) Correlation matrix of all H3K4me3 ChIP-seq libraries for mouse ESCs. Cell lines and strains clustered by correlation dissimilarity. Parental strains have three technical replicates of the same cell line and three biological replicates of ESCs from independently derived blastocysts. The two BXD lines are represented by five biological replicates each. (E) Similar to *D* except showing Pearson correlations matrix for cardiomyocytes. Each biological replicate represents cells isolated from three individual mice. (D) Similar to *E* except showing correlation matrix for biological replicates of hepatocytes – each biological replicate represents cells isolated from a single female mouse.
